22 habitats). Here we use a genomic (ddRADseq), model-based approach to delimit a cryptic  
23 species complex of tropical sea anemones that are co-distributed on coral reefs throughout the  
24 Tropical Western Atlantic. We use coalescent simulations in *fastsimcoal2* to test competing  
25 diversification scenarios that span the allopatric-sympatric continuum. We recover support that  
26 the corkscrew sea anemone *Bartholomea annulata* (Le Sueur, 1817) is a cryptic species  
27 complex, co-distributed throughout its range. Simulation and model selection analyses suggest  
28 these lineages arose in the face of historical and contemporary gene flow, supporting a sympatric  
29 origin, but an alternative secondary contact model also receives appreciable model support.  
30 Leveraging the genome of *Exaiptasia pallida* we identify five loci under divergent selection  
31 between cryptic *B. annulata* lineages that fall within mRNA transcripts or CDS regions. Our  
32 study provides a rare empirical, genomic example of sympatric speciation in a tropical  
33 anthozoan- a group that includes reef-building corals. Finally, these data represent the first  
34 range-wide molecular study of any tropical sea anemone, underscoring that anemone diversity is  
35 under described in the tropics, and highlighting the need for additional systematic studies into  
36 these ecologically and economically important species.

37

## 38 **1. Introduction**

39       Understanding the processes by which species form is fundamental to evolutionary  
40 biology. Historically, Darwin championed the role of deterministic mechanisms (i.e. selection),  
41 while the dominant paradigm of the Modern Synthesis required physical isolation as the primary  
42 starting point for reproductive isolation and speciation (e.g. Bird, Fernandez-Silva, Skillings, &  
43 Toonen, 2012; Bowen, Rocha, Toonen, Karl, & the ToBo Laboratory, 2013; Coyne & Orr, 2004;  
44 Gaither et al., 2015; Orr & Smith, 1998; Via, 2001). Under a deterministic framework, physical

45 isolation is not a prerequisite for speciation, and selection can maintain reproductive isolation  
46 between sympatric populations in the early stages of divergence. The influential biologists of the  
47 20<sup>th</sup> century Modern Synthesis (i.e. Dobzhansky, Mayr, Maynard Smith) largely rejected  
48 sympatric speciation (reviewed by Bird et al., 2012), citing the homogenizing effects of gene  
49 flow and chromosomal rearrangement to prevent loci under divergent selection from  
50 accumulating and promoting reproductive isolation. Today, after decades of molecular data  
51 generation and increasing DNA sequencing technology, the idea of sympatric speciation is no  
52 longer as controversial. The gradually evolving genome championed by the Modern Synthesis is  
53 now giving way to a paradigm where it is understood that selection can drive divergence over  
54 short timescales without physical isolation, even in the face of historical and ongoing gene flow  
55 (e.g. Christie et al., 2017; Dennenmoser, Vamosi, Nolte, & Rogers, 2017; Feder, Egan, & Nosil,  
56 2012; Nadeau et al., 2012; Renaut et al., 2013).

57         However, the relative contributions of allopatric and sympatric speciation in generating  
58 patterns of global biodiversity remain largely unresolved (e.g. Bolnick & Fitzpatrick, 2007;  
59 Bowen et al., 2013) because different evolutionary processes can lead to similar outcomes. For  
60 example, it is challenging to empirically establish that co-distributed sister taxa diversified in  
61 sympatry versus allopatry, and that the contemporary geographic overlap isn't the result of  
62 secondary contact following an allopatric diversification event (reviewed by Bird et al., 2012).  
63 Coyne and Orr (2004) suggest that divergence in sympatry, versus allopatric divergence and  
64 secondary contact, would be inferred only if the species exhibit reciprocal monophyly and are  
65 reproductively incompatible, or that an allopatric explanation seems unlikely. These criteria may  
66 be difficult to establish, as newly diverged species may not be reciprocally monophyletic across  
67 all individuals at all loci due to gene flow, periodic introgression, and incomplete lineage sorting.

68 Further, contemporary distributions may not reflect historical ones, and range shifts in the distant  
69 past may obscure the geographic setting of diversification (e.g. Quenouille et al., 2011; Renema  
70 et al., 2008). Mathematical models present another paradigm to demonstrate that a sympatric  
71 explanation is favored over alternative scenarios (Bird et al., 2012). These allow researchers to  
72 test competing diversification scenarios, build models that incorporate explicit parameters for the  
73 directionality, magnitude, and timing of migration events, and use model selection to objectively  
74 and quantitatively inform demographic inference. For co-distributed sister taxa with no obvious  
75 geographic partitioning, patterns that demonstrate divergence in the face of ancestral and  
76 contemporary gene flow are considered among the strongest lines of evidence supporting  
77 sympatric diversification scenarios (Bird et al., 2012).

78 Tropical coral reefs are being increasingly viewed as fruitful ecosystems to explore  
79 sympatric speciation (Bowen et al., 2013). Coral reefs are the most biodiverse marine habitats on  
80 the planet, yet the bulk of diversity resides on less than 0.1% of the seafloor, in a setting with few  
81 hard barriers to dispersal. Purely allopatric models of speciation are an uneasy fit for describing  
82 diversification on this scale in this habitat (Bowen et al., 2013; Gaither et al., 2015; Gaither &  
83 Rocha, 2013; Rocha & Bowen, 2008). Evidence for non-allopatric divergence on coral reefs has  
84 been increasing, mainly from reef fishes, including species such as angelfishes, hamlets,  
85 damselfishes, wrasses, basslets, grunts, and gobies (Bernal, Gaither, Simison, & Rocha, 2017;  
86 Bowen et al., 2013; Hodge, Read, Bellwood, & Herwerden, 2013; Gaither et al., 2015; ;  
87 Munday, van Herwerden, & Dudgeon, 2004;). Examples from invertebrate species are rarer, but  
88 sympatric speciation has been invoked to explain the diversification in limpets, nudibranchs,  
89 sponges, and corals (reviewed by Bowen et al. 2013). Most of the accepted examples of putative  
90 sympatric speciation from tropical marine systems have been made by documenting genetic

91 differentiation between species/populations with overlapping distributions, but that segregate  
92 ecologically or in some other non-allopatric manner (e.g. Bongaerts et al., 2010; 2013). Other  
93 studies have used genomics to search for the basis of ecological adaptation for co-distributed  
94 species, and thus the basis for maintaining reproductive isolation and putative cause of  
95 divergence, but have not focused on the historical demographics of the speciation process itself  
96 (e.g. Rose, Bay, Morikawa, & Palumbi, 2018). The result is that many of the studies invoking  
97 sympatric diversification to explain the observed genetic and ecological patterns on reefs, while  
98 likely correct in many cases, arrive at these conclusions *post hoc*, and do not test competing  
99 speciation hypotheses. Modeling alternative processes provides a more objective way to assess  
100 the contributions of sympatric speciation, and helps avoid data over interpretation by  
101 incorporating statistical uncertainty into the model selection process (e.g. Knowles, 2009).

102         Here we conduct range-wide population-level sampling on coral reefs throughout the  
103 Tropical Western Atlantic (TWA) for the corkscrew sea anemone *Bartholomea annulata*, a  
104 common and ecologically important sea anemone that is described as a single species throughout  
105 its range (e.g. Briones-Fourzán, Pérez-Ortiz, Negrete-Soto, Barradas-Ortiz, & Lozano-Álvarez,  
106 2012; Titus & Daly, 2017; Titus, Daly, & Exton, 2015; Titus et al., 2017). Using a double digest  
107 restriction-site associated DNA sequencing (ddRADseq) approach, we detect support for a  
108 previously unrecognized cryptic species that is co-distributed throughout the region. We then use  
109 the joint-folded allele frequency spectrum and coalescent simulations to model alternative  
110 diversification hypotheses. Finally, we conduct genome scans to identify loci under putative  
111 natural selection, and then leverage the close relationship between *B. annulata* and *Exaiptasia*  
112 *pallida* (see Grajales & Rodriguez, 2016), a species for which a genome has been published  
113 (Baumgarten et al., 2014), to explore whether these fall within, or are linked to, functional

114 coding regions. Our model selection results provide one of the first genomic examples of  
115 sympatric speciation in the face of historical and ongoing gene flow in a tropical anthozoan,  
116 although an alternative secondary-contact model receives appreciable model support. This study  
117 highlights the importance of testing alternative diversification hypotheses and accounting for  
118 model uncertainty when conducting studies aimed at empirically demonstrating sympatric  
119 diversification. Lastly, these data represent the first range-wide molecular investigation into any  
120 reef-dwelling sea anemone in the world, underscoring that anemone diversity is under described  
121 in the tropics, and highlighting the need for additional systematic studies into these ecologically  
122 and economically important species.

123

## 124 **2. Material and Methods**

### 125 *2.1. Sample collection, DNA isolation, and library preparation*

126 Tissue samples (i.e. tentacle clippings and whole animals) were collected by hand using  
127 SCUBA from 14 sample localities spanning the geographic range of *B. annulata*, and from  
128 localities separated by known phylogeographic barriers (Fig. 1; reviewed by DeBiasse, Richards,  
129 Shivji, & Hellberg, 2016). Samples were collected from coral reef habitats between 5- and 20-m  
130 depth, preserved on shore, and transferred back to The Ohio State University for DNA extraction  
131 and sequencing. Genomic DNA was isolated using DNeasy Blood and Tissue Kits (Qiagen Inc.)  
132 and stored at -20°C. DNA degradation was assessed for each sample using gel electrophoresis,  
133 and only samples with high molecular weight DNA were carried forward for ddRADseq library  
134 preparation. DNA concentrations were quantified (ng/uL) using a Qubit 2.0 (ThermoFisher)  
135 fluorometer and dsDNA broad-range assay kits. 20uL aliquots, each with 200ng of DNA, were  
136 prepared for each sample and used for ddRADseq library preparation.

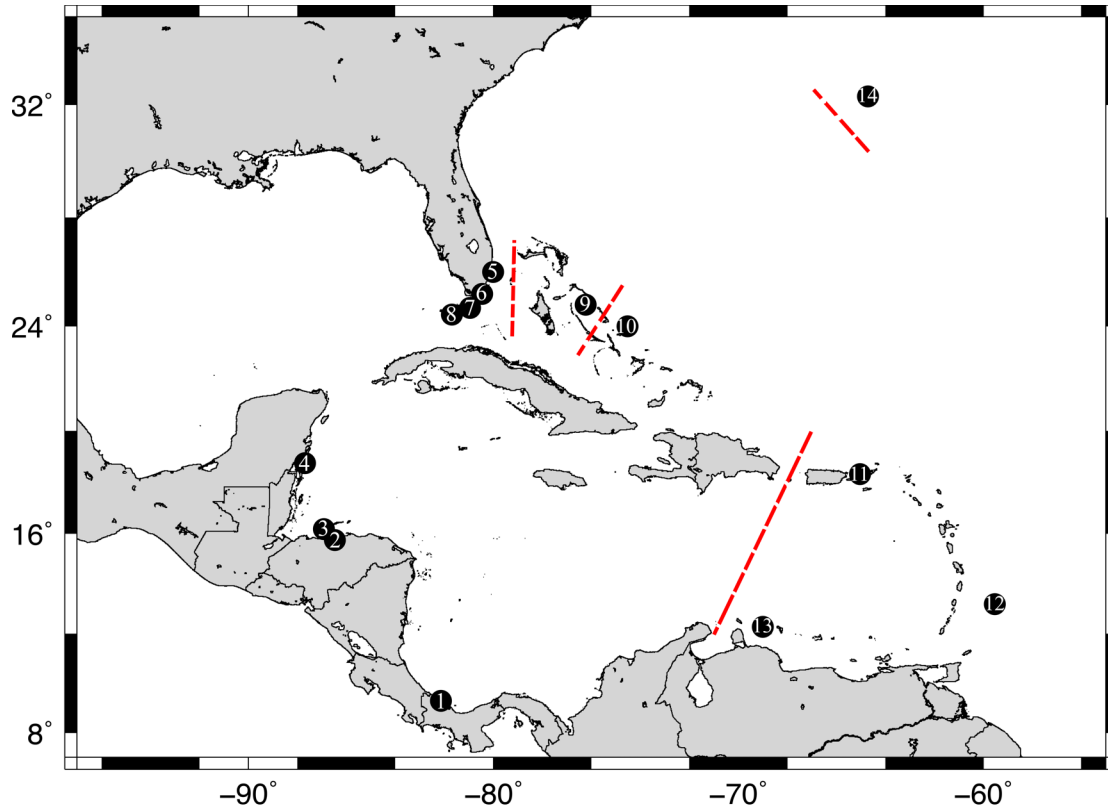

Figure 1. Map of sampling localities in the Tropical Western Atlantic for the corkscrew sea anemone *Bartholomea annulata*. 1) Bocas del Toro, Panama, 2) Cayos Cochinos, Honduras, 3) Utila, Honduras, 4) Mahahual, Mexico, 5) Ft. Lauderdale, Florida, 6) Upper Keys, Florida, 7) Middle Keys, Florida, 8) Lower Keys, Florida, 9) Eleuthera, Bahamas, 10) San Salvador, Bahamas, 11) St. Thomas, US Virgin Islands, 12) Barbados, 13) Curacao, 14) Bermuda. Dashed lines denote previously recovered major phylogeographic breaks and allopatric boundaries in the region. Sympatric lineages were recovered from all localities except Honduras (2, 3), Virgin Islands (11), and Bermuda (14).

137

138           Between 12-15 individual *B. annulata* samples per locality were carried forward for  
139 library preparation. We used a ddRADseq library preparation protocol following Sovic, Fries, &  
140 Gibbs (2016). Briefly, genomes were digested using two restriction enzymes (*EcoRI*-HF and  
141 *psti*-HF), Illumina compatible barcodes were annealed to restriction cut sites, samples were size  
142 selected manually using a 400-800 bp size range, and then cleaned using Nucleospin Gel and  
143 PCR clean up kits (Macherey-Nagel). Following size selection, each individual sample was  
144 amplified using polymerase chain reaction (PCR), cleaned using AMPure XP beads (Agilent),

145 and then quantified via quantitative PCRs (qPCR) to inform the pooling of individual samples  
146 into final libraries. A total of 141 individuals (Table 1) met all quality control steps and were  
147 pooled across five separate libraries. Samples were sequenced on an Illumina HiSeq 2500 using  
148 single-end 100 base pair reads at The Ohio State University Genomics Shared Resource.

149

## 150 2.2. Data processing and dataset assembly

151 Raw sequence reads were demultiplexed, aligned, and assembled *de novo* using the  
152 program pyRAD v3.0.66 (Eaton, 2014). We required a base call Phred score of 20 and set the  
153 maximum number of bases in a locus with Phred scores < 20 (NQual) to five. Low quality base  
154 calls were replaced with Ns. We set the clustering threshold (Wclust) to 0.90 to assemble reads  
155 into loci, and required a minimum coverage depth of seven to call a locus (Mindepth). Finally,  
156 we required a locus to be present in 75% of all individuals to be retained in the final dataset.  
157 RADseq protocols are known to be susceptible to missing data due to mutations in restriction cut  
158 sites and allelic dropout (e.g. Arnold, Corbett-Detig, Hartl, & Bomblies, 2013), but biases can  
159 also arise when datasets are overly conservative (i.e. no missing data allowed; Huang &  
160 Knowles, 2014). Thus we allowed some missing data in our final dataset.

161 Like most coral reef dwelling anthozoans, *B. annulata* hosts endosymbiotic  
162 dinoflagellates from the genus *Symbiodinium* (e.g. Grajales & Rodriguez, 2016). Thus, DNA  
163 extractions harbor a mix of anemone and dinoflagellate DNA, and the resulting ddRAD  
164 sequencing yields a mixture of anemone and *Symbiodinium* sequences. To deal with the  
165 potentially confounding *Symbiodinium* DNA contamination and verify that our final data set  
166 contains SNPs that are anemone DNA only, we created a symbiont-free dataset by mapping  
167 ddRADseq loci to the *Exaiptasia pallida* genome (Baumgarten et al., 2014). *Exaiptasia pallida*



168 and *B. annulata* are members of the same family and are closely related (Grajales & Rodriguez,  
169 2016), and polymorphic microsatellites have previously been designed from *E. pallida* that  
170 amplify in *B. annulata* (Titus et al., 2017). To map polymorphic *B. annulata* loci to *E. pallida*,  
171 we downloaded the *E. pallida* genome and created a local BLAST database. After initially  
172 running pyRAD to completion, a python script (parse\_loci.py, available on Dryad doi:XXX) was  
173 written to select the first DNA sequence from each locus in the .loci output file, and create a  
174 .fasta file that could then be BLASTed against the *E. pallida* genome (BLAST+; Camacho et al,  
175 2009). We used an 85% identity threshold to call a locus as putatively anemone in origin, to  
176 avoid being over conservative as we were not mapping to a conspecific genome. Next, a separate  
177 python script (blast2loci.py, available on Dryad doi:XXX) was written to read through the  
178 BLAST output file, pull all sequences in all loci that met the 85% identity threshold, and create a  
179 new .loci file with the same file name as the original. The original .loci file was then replaced  
180 with the new anemone-only file, at which point the final step of pyRAD (step 7) was re-run to  
181 create our final anemone-only output files (i.e. unlinked SNPs and alleles files) for downstream  
182 analyses.

183

### 184 2.3. Genetic clustering and species delimitation

185 To search for evidence of cryptic species-level diversity, we used the clustering program  
186 Structure v2.3.4 (Pritchard, 2000) as a preliminary species discovery analysis (i.e. no *a priori*  
187 species assignments; reviewed by Carstens, Pelletier, Reid, & Satler, 2013). We collapsed bi-  
188 allelic data into haplotypes at each locus, using information contained in linked SNPs when more  
189 than one SNP was present in a locus. Each analysis in Structure was run using the full set of  
190 samples (Table S1), and used the admixture model, correlated allele frequencies, and sampling

191 location. Each MCMC chain for each value of  $K$  was run with a burnin of  $1 \times 10^5$  generations  
192 and sampling period of  $2 \times 10^5$  generations. We conducted five iterations of a broad range of  $K$   
193 values (1–6), to gain an initial snapshot of the data across the region. In both initial analyses we  
194 used the peak  $\ln \Pr(D|K)$  and the  $\Delta K$  (Evanno et al. 2005) to help select the best  $K$  value.

195       Structure analyses overwhelmingly selected  $K = 2$  as the best clustering scheme with both  
196 genetic clusters being co-distributed throughout the entire TWA, save for Bermuda and the US  
197 Virgin Islands (see Results). Because this pattern may suggest the presence of an unrecognized  
198 cryptic anemone species, we conducted species delimitation analyses using path sampling and  
199 Bayes factors using the program SNAPP and Bayes Factor Delimitation\* (BFD\*; Leache, Fujita,  
200 Minin, & Bouckaert, 2014). BFD\* uses unlinked SNPs and marginal likelihood estimates  
201 (MLEs) calculated via path sampling in the species tree program SNAPP (Bryant et al., 2012) to  
202 perform model selection on competing species delimitation models. We tested the current  
203 concept of *B. annulata* (i.e. a single TWA species) versus the alternative model (i.e. two  
204 sympatric species). Bayes Factors were calculated after Leache et al. (2014). Positive values  
205 indicate support for model 1 (current concept) while negative values indicate support for model 2  
206 (competing species delimitation models; Leache et al., 2014).

207       Due to the computational constraints running SNAPP with biallelic SNP data (i.e.  
208 computation time increases linearly as more loci are added but exponentially as more samples  
209 are added), and missing data constraints for estimating species trees (i.e. data has to be present in  
210 at least one individual at each locus for each putative species) we created new SNP datasets by  
211 significantly reducing the number of total individuals so that our analyses could be completed  
212 over the course of days rather than weeks or months. Similar approaches have been taken by  
213 previous studies (e.g. Sovic et al., 2016). We used  $n = 5$  randomly selected individuals from each

214 genetic cluster delimited by Structure and used *E. pallida* as an outgroup as BFD\* can only  
215 perform model selection on models with  $n \geq 2$  species (Table S2).

216 Of 11 total individuals included in this subset analysis, we required a locus to be present  
217 in 10 of 11 individuals to meet the requirements of species tree estimation. Our species  
218 delimitations were thus a two species model (*E. pallida* + current concept of *B. annulata*) and a  
219 three species model (*E. pallida* + *B. annulata* Clade 1 + *B. annulata* Clade 2). For each SNAPP  
220 analysis, mutation rates  $u$  and  $v$  were set to 1 and were not sampled and the coalescent rate was  
221 set at 10 and sampled throughout the analysis. We used only polymorphic loci and a broad  
222 gamma distributed (2, 200) prior for speciation rate ( $\lambda$ ). Each step in the path analysis (48 steps)  
223 was conducted in SNAPP v1.3 and BEAST v.2.4.6 (Bouckaert et al., 2014) for  $1 \times 10^5$  MCMC  
224 generations with 10% discarded as burnin.

225 As we did not include any *E. pallida* samples in our ddRAD sequencing, we wrote a  
226 python script that located and pulled the segments of DNA from the *E. pallida* genome where  
227 our 100bp *B. annulata* loci mapped with high confidence using BLAST searches  
228 (add\_outgroup.py, available on Dryad; LINK). These 100bp segments of *E. pallida* DNA were  
229 then incorporated into, and aligned with, our *B. annulata* RAD loci using Muscle v3.8.31 (Edgar  
230 2004). SNPs were recoded and one SNP per locus was pulled randomly to create a new unlinked  
231 SNP .nexus file that could be inputted into SNAPP (aln2snapp.py, available on Dryad doi:XXX).  
232 This novel approach for using current genomic resources to add outgroups to RADseq datasets  
233 should be amenable to any set of closely related species. The script, along with full details and  
234 instructions for using it, can be found on Dryad (doi:XXX).

235

236 *2.4. Model selection*

237 We used the allele frequency spectrum (AFS) and a coalescent simulation approach using  
238 the program *fastsimcoal2* (FSC2; Excoffier, Dupanloup, Huerta-Sánchez, Sousa, & Foll, 2013)  
239 to provide empirical support that the pattern of cryptic species-level diversity we detect using our  
240 ddRADseq dataset most likely arose sympatrically. FSC2 uses coalescent simulations to  
241 calculate the composite likelihood of arbitrarily complex demographic models under a given  
242 AFS. The best-fit model can then be selected using the Akaike Information Criterion (AIC).

243 We built 12 demographic models (Fig. 2), all variants of the two-population isolation-  
244 migration models, as Structure and BFD\* analyses support two lineages of *B. annulata* (see  
245 Results). Models are isolation-only, isolation followed by secondary contact, and models that  
246 incorporate historical and contemporary gene flow (Fig. 2). We aim to test the likelihood of  
247 alternative hypotheses given the available data rather than attempting to prove sympatric  
248 speciation with “air-tight” evidence (Bird et al., 2012). For lineages that are co-distributed  
249 throughout their entire range, the strongest evidence for sympatric diversification would be  
250 models that demonstrate both historical and contemporary gene flow (i.e. no interruption of gene  
251 flow). These models necessarily exclude allopatric scenarios where complete geographic  
252 isolation has disrupted gene flow to initiate divergence (Bird et al., 2012). Conversely, the  
253 weakest evidence for sympatric speciation would be isolation-only and secondary-contact  
254 models. In the latter scenario, we would fail to reject scenarios where divergence occurred with  
255 complete allopatric isolation but became sympatrically distributed and resumed gene flow after  
256 secondary contact.

257 To conduct simulation analyses, two-population, joint-folded AFS were generated from  
258 pyRAD output files and previously published python scripts (see Satler & Carstens, 2017) using  
259 24 randomly selected individuals from the more well sampled *B. annulata* lineage (Clade 2) and

260 all 16 individuals from the less sampled lineage (Clade 1; Table S3). One of the assumptions of  
261 FSC2 is that SNPs are in linkage equilibrium (Excoffier et al., 2013), and thus, only one SNP per  
262 locus was selected to produce the AFS. Further, AFS calculations in FSC2 require fixed numbers  
263 of alleles from all populations (i.e. no missing data). As meeting this latter requirement would  
264 greatly decrease our dataset size, and thus likely bias our analyses, we followed the protocol of  
265 Satler and Carstens (2017) and Smith et al., (2017) by requiring a locus in our AFS to be present  
266 in 85% of all individuals. To account for missing data without violating the requirements of the  
267 AFS we built our AFS as follows: 1) if a locus had fewer alleles than our threshold it was  
268 discarded, 2) if a locus had the exact number of alleles as the threshold, the minor allele  
269 frequency was recorded, and 3) if a locus exceeded the threshold, alleles were down-sampled  
270 with replacement until the number of alleles met the threshold, at which point the minor allele  
271 frequency was counted. This approach allowed us to maximize the number of SNPs used to build  
272 the AFS, but also has the potential to lead to monomorphic alleles based on the down-sampling  
273 procedure (see Satler and Carstens 2017). Thus, we repeated the AFS building procedure 10  
274 times, allowing us to account for variation in the down-sampling process during model selection,  
275 but also allowing us to calculate confidence intervals on our parameter estimates (Satler and  
276 Carstens, 2017; Smith et al., 2017).

277 Each simulation analysis in FSC2 (i.e. each AFS replicate per model; 12 models x 10  
278 replicates) was repeated 50 times, and we selected the run with the highest composite likelihood  
279 for each AFS replicate and model. The best-fit model was then calculated using the AIC and  
280 model probabilities calculated following Burnham and Anderson (2002). Because FSC2 requires  
281 a per generation mutation rate to scale parameter estimates into real values, we used the  
282 substitution per site per generation mutation rate of  $4.38 \times 10^{-8}$  proposed for tropical anthozoans

283 (Prada et al., 2017) and a generation time of 1 year for *B. annulata* (Jennison, 1981). All analyses  
 284 were conducted on the Oakley cluster at the Ohio Supercomputer Center (<http://osc.edu>).

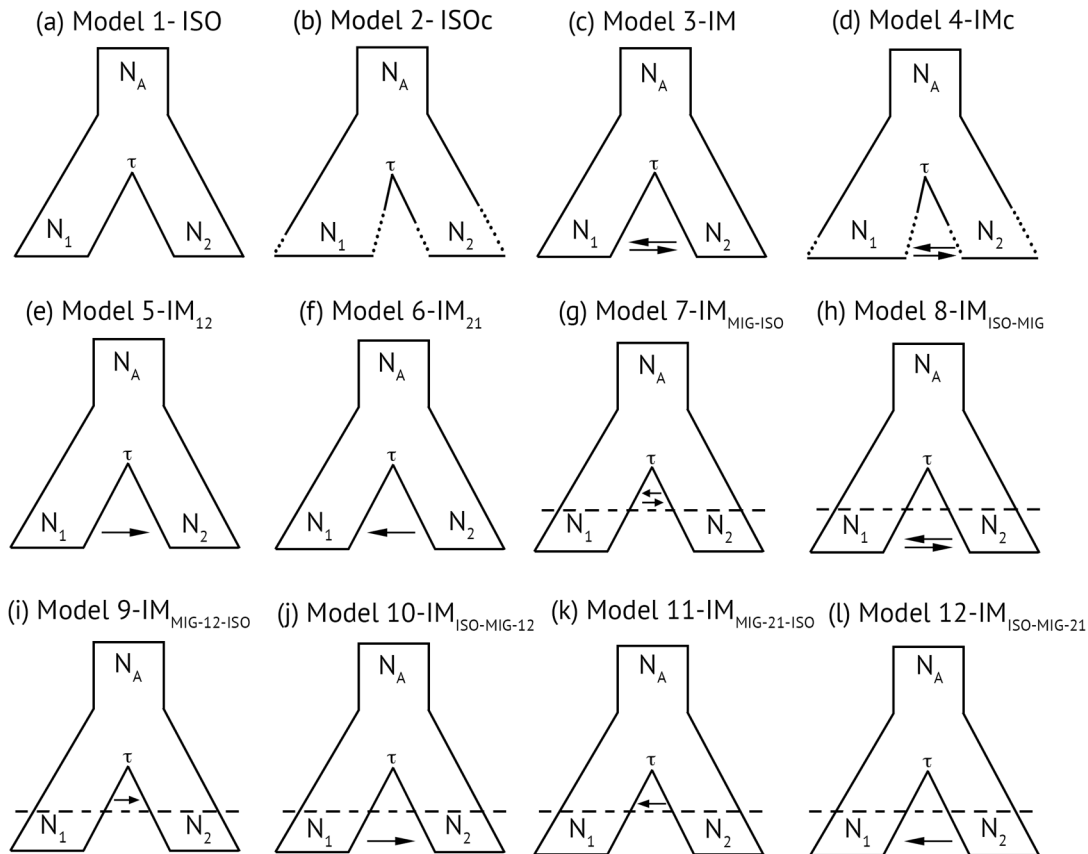

Figure 2. Models used in FSC2 to understand the demographic processes leading to cryptic diversification in the corkscrew anemone *Bartholomea annulata*. Each model is a two-population isolation-migration (IM) model that varies in the degree and directionality of gene flow and effective population size. Models are as follows: a) isolation only, b) isolation only with population size changes following divergence, c) IM model with symmetric migration, d) IM model with symmetric migration and population size changes, e) IM model with migration from population 1 to 2, f) IM model with migration from population 2 to 1, g) IM model with symmetric migration between populations immediately following divergence, followed by more recent divergence, h) IM model with isolation immediately following divergence, followed by more recent secondary contact and symmetric migration, i) IM model with migration from population 1 to 2 immediately following divergence followed by more recent isolation, j) IM model with isolation immediately following divergence followed by secondary contact and migration from population 1 to 2, k) IM model with migration from population 2 to 1 immediately following divergence followed by more recent isolation, and l) IM model with isolation immediately following divergence followed by secondary contact and migration from population 2 to 1.

285

286 2.5. Detecting and identifying loci under selection

287 Islands of genomic divergence linked to functional genes under selection are common in  
288 sympatrically diverging species (e.g. Renaut et al., 2013). To detect and identify loci under  
289 putative selection that may be contributing to the divergence of our newly delimited *B. annulata*  
290 lineages we used the program BayeScan v.2.1 (Foll & Gaggiotti, 2008). This program uses  
291 logistical regression and a Bayesian framework to statistically search for loci under natural  
292 selection. It implements a locus effect and population effect in the model to explain the observed  
293 patterns of differentiation. If the locus effect is needed to explain the pattern, divergent selection  
294 is indicated (Folk & Gaggiotti, 2008). We used 100,000 simulations with prior odds of 8 (i.e.  
295 how much more likely the neutral model is than the selection model), and a false discovery rate  
296 of 10%. Results were summarized and outlier loci visualized using R v3.3.1 and RStudio v0.98  
297 (R Core Team 2014).

298 We used the genome of *E. pallida* to identify where in the genome the SNPs under  
299 putative selection reside and to determine whether they are in, or in close proximity to,  
300 functional coding regions. We used the full 100bp sequence from which each outlier SNP was  
301 recovered, and then mapped each locus to the annotated *E. pallida* genome (Baumgarten et al.,  
302 2014) using Geneious v10.2.3 (Kearse et al., 2012). For outlier loci that did not fall within  
303 coding regions, we recorded the distance (in bp) to the next-closest coding region, as these loci  
304 may be linked to functional genes under selection.

305

### 306 **3. RESULTS**

#### 307 *3.1. RADseq dataset assembly*

308 Double digest RADseq library preparation and sequencing resulted in a total of 186.7  
309 million sequence reads across 141 individuals, 175.6 million of which passed quality control

310 filtering and were retained to create the final dataset. Twenty-two of the 141 individuals had <  
311 500,000 reads and were not retained in the final dataset. Requiring a locus to be present in a  
312 minimum of 75% of all individuals resulted in a final data set of 10,998 parsimoniously  
313 informative sites distributed across 3176 unlinked loci in 119 individuals. BLASTing these loci  
314 to the *Exaiptasia pallida* genome identified 1402 loci that matched with high confidence ( $\geq 85\%$   
315 identity); these were used as the final anemone-only SNP dataset. The remaining 1772 loci that  
316 did not map to any genomic resources were discarded as their identity (anemone or algal) could  
317 not be verified. SNP files and datasets are available on Dryad (Dryad doi:XXX).

318

### 319 3.2. Genetic clustering and species delimitation

320 Genetic clustering approaches in Structure [i.e.  $\Delta K$  and the mean  $\ln P(K)$ ] both selected  $K$   
321 = 2 as the optimum partitioning scheme (Table 2; Figure 3). Both genetic clusters were co-  
322 distributed and recovered from all sampling localities with the exception of Bermuda, Honduras,  
323 and the US Virgin Islands. One cluster, henceforth *B. annulata* Clade 1, was sampled  
324 infrequently and was represented by only 16 individuals (13% of all sampled individuals)  
325 throughout the TWA, while the second cluster, henceforth *B. annulata* Clade 2, was well  
326 sampled and comprised the majority of the samples (87%; Figure 3). Some admixture between *B.*  
327 *annulata* clades is evident in our Structure results (Figure 3). Species delimitation analyses using  
328 SNAPP and BFD\* support both genetic clusters recovered by Structure as separate species,  
329 favoring the alternative model to the current taxonomy model (Table 3).

330

331

332



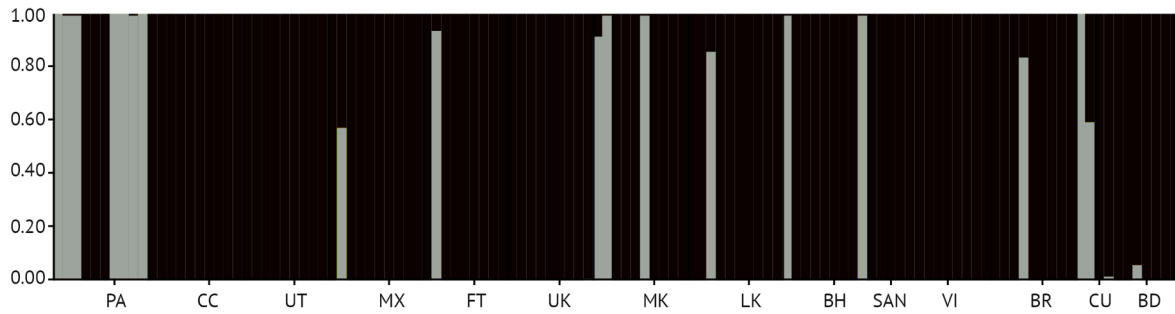

Figure 3. Structure plot denoting  $K = 2$  genetic clusters for the corkscrew sea anemone *Bartholomea annulata* distributed sympatrically throughout the Tropical Western Atlantic. Samples are partitioned by sample locality (Fig 30): PA = Bocas del Toro, Panama, CC = Cayos Cochinos, Honduras, UT = Utila, Honduras, MX = Mahahual, Mexico, FT = Ft. Lauderdale, Florida, UK = Upper Keys, Florida, MK = Middle Keys, Florida, LK = Lower Keys, Florida, BH = Eleuthera, Bahamas, SAN = San Salvador, Bahamas, VI = St. Thomas, US Virgin Islands, BR = Barbados, CU = Curacao, BD = Bermuda. The order of listed sample localities reflects a roughly West to East distribution across the Tropical Western Atlantic.

### 333 3.3. Coalescent model selection

334 The best fit model under the Akaike Information Criterion (AIC) is model 5 (Figure 2),  
335 an IM model with unidirectional gene flow from *B. annulata* Clade 1 to Clade 2 (Table 4). Also  
336 supported was model 10, an IM model with isolation immediately following divergence followed  
337 by secondary contact and migration from *B. annulata* Clade 1 to Clade 2. Each of the top three  
338 models according to AIC specified unidirectional gene flow from *B. annulata* Clade 1 to Clade  
339 2. Isolation-only models received an inconsequential amount of support (Table 4). For the best-  
340 fit model, FSC2 simulation places divergence time estimates between putative species at 2.1  
341 mya. In general, parameter estimates for the two best-fit models were broadly similar, except in  
342 divergence time, which was estimated at a far older date in model 10 than model 5 (Table 5).

343

### 344 3.4. Detecting and identifying loci under selection

345 We detected 31 outlier loci, out of 1401 total loci, using BayeScan v.2.1 (Figure S1). Six  
346 were characterized as being outliers with high  $F_{st}$ , and putatively under divergent selection. The

347 remainder had low  $F_{st}$ , compared with the remaining dataset, and are putatively under balancing  
348 selection. The genomic positions of all 31 outlier loci were identified by mapping full 100 bp  
349 reads to the *E. pallida* genome. 15 loci mapped within exons of coding regions (CDS), nine  
350 mapped to mRNA transcripts, and the remaining loci did not map to any known functional  
351 regions (Table 6). Of the loci that did not map to an mRNA transcript or coding region, we  
352 identified the next closest gene and mRNA transcript, as these could potentially be linked to  
353 genes under selection.

354         The six loci identified as being under divergent selection (loci 1, 97, 197, 1160, 1224, and  
355 1326) all had  $F_{st}$  values exceeding 0.60 with a maximum observed  $F_{st}$  value of 0.93 (Figure S1).  
356 Locus 197 and 1160 were identified as residing within CDS/exon regions, and mapped to the  
357 predicted functional genes zinc finger FYVE domain-containing protein and snaclec rhodocetin  
358 subunit alpha respectively (Table 6). Locus 1, 97, and 1326 mapped to mRNA transcripts in  
359 association with neuronal acetylcholine receptor subunit alpha-10, C-C chemokine receptor type  
360 4, and phosphate 1 regulatory subunit 12A genes respectively (Table 6). Locus 1224 did not map  
361 to a known functional region in the *E. pallida* genome and was 7,000 bp from a receptor-type  
362 tyrosine-protein phosphate delta gene.

363

## 364 **4. DISCUSSION**

### 365 *4.1. Genomic signatures of sympatric speciation*

366         Tropical coral reefs have extraordinary levels of biodiversity that reside on a small  
367 fraction of suitable habitat space and that occupy large biogeographic ranges. Most reef species  
368 have planktonic larval stages, and all marine species reside in a physical environment that should  
369 facilitate dispersal, gene flow, and large effective population sizes. This dichotomy highlights the

370 challenge of disentangling sympatric diversification from allopatric diversification followed by  
371 secondary contact on reefs, as incipient species that diverge in allopatry can readily become co-  
372 distributed with their sister taxa unless permanently isolated by hard barriers to dispersal (i.e.  
373 continental land masses). Here we provide one of the first genomic, model-based, tests of  
374 sympatric speciation in a reef-dwelling species. Our coalescent simulation analyses and model  
375 selection suggest that two co-distributed lineages of sea anemones, currently described as a  
376 single species, the corkscrew anemone *Bartholomea annulata*, have diverged in the face of  
377 continuous, unidirectional, gene flow on reefs throughout the Tropical Western Atlantic. We  
378 note, however, that there is model support for an alternative secondary contact scenario where  
379 gene flow was suspended for a prolonged period of time.

380         Definitions of sympatric speciation have, historically, been contentious, and there is no  
381 agreed upon consensus definition (reviewed by Bird et al., 2012). We define sympatric  
382 speciation in a broad biogeographic sense: both lineages of *B. annulata* are sympatric in their  
383 broad-scale biogeography, co-occur in several places, and lack major allopatric barriers across  
384 their ranges. Well-resolved allopatric boundaries in the Tropical Western Atlantic linked to  
385 putative speciation events include the Mona Passage between the islands of Hispanola and  
386 Puerto Rico, the Florida Straits separating the Florida peninsula from the Bahamas and Cuba, the  
387 isolated archipelago of Bermuda, and a Central Bahamas break (reviewed by DeBiasse et al.,  
388 2016). Reefs off the coast of Panama are another biogeographic sub-region within the Tropical  
389 Western Atlantic that are physically isolated by ocean currents (i.e. the Panamanian Gyre;  
390 Richardson, 2005) and have a propensity to show limited genetic connectivity with nearby reefs  
391 (e.g. Andras, Kirk, & Harvell, 2011; Andras, Rypien, & Harvell, 2013; DeBiasse et al., 2016).  
392 Interestingly, 7 of the 16 individuals from our infrequently sampled Clade 1 lineage came from

393 reefs from Bocas del Toro, Panama (Fig. 3). Given the appreciable model support for a  
394 secondary contact divergence scenario, it could be possible that a population of *B. annulata*  
395 became physically isolated in Panama for a prolonged period of time, followed by limited  
396 dispersal from this region to the rest of the Caribbean and Tropical Western Atlantic leading to  
397 its co-distribution. In this current study, we had to trade off increasing the number of samples  
398 sequenced per locality to increase the sampling distribution to include the entire range of the  
399 species. Increased sampling and sequencing for *B. annulata* from each locality throughout the  
400 region may be warranted and provide a better idea of the abundance of our Clade 1 lineage.

401       Many species with overlapping broad-scale biogeographic distributions can become  
402 specialized in different ecological niches and habitats, and thus, may become physically isolated  
403 from each other on a fine-scale (termed micro-allopatry; Bird et al., 2012; Getz & Kaitala, 1989;  
404 Tobler, Riesch, Tobler, Schulz-Mirbach, & Plath, 2009). For the *B. annulata* species complex,  
405 we found no obvious ecological or habitat difference that could explain a micro-allopatric  
406 divergence scenario. Samples from both putative lineages were collected from the same reef  
407 sites, at the same depths, and with the same crustacean symbionts. Our sample localities across  
408 the TWA span a continuum of reef environments from shallow, high-nutrient, nearshore patch  
409 reef sites in Bocas del Toro, Panama, to fore reefs along the Meso-American Barrier reef in  
410 Mexico, and Bahamian patch reefs surrounded by seagrass. Further, in many micro-allopatric  
411 divergence scenarios, habitat specialization is expected to lead to immediate isolation and a  
412 cessation of gene flow should follow (Bird et al., 2012; Tobler et al., 2009). Our model selection  
413 analyses prefer models with continuous unidirectional gene flow rather than models where a  
414 period of isolation followed divergence and that contemporary gene flow is the result of  
415 secondary contact. For these reasons, we conclude that the *B. annulata* species complex likely

416 evolved in sympatry. Additional sampling with a greater focus on sampling across disparate  
417 habitats at each sample locality may provide greater clarity as to whether any micro-allopatric  
418 divergence scenarios are responsible for the divergence we have recovered.

419 In addition to overlapping biogeographic ranges, no obvious habitat partitioning, and a  
420 genomic signature of divergence with continuous gene flow, our genome scan analyses recover a  
421 number of loci that appear to be under selection (Table 6; Fig. S1). These include loci that are  
422 under putative divergent selection, and those that are more conserved relative to their neutrally  
423 evolving counterparts. The genomic underpinnings that may drive divergence and maintain  
424 reproductive isolation, even with continuous gene flow, are unknown in benthic anthozoans. In  
425 the stony coral genus *Acropora*, the *PaxC* gene (a nuclear intron) resolves a tree topology that  
426 clusters conspecifics that spawn in the same seasons, but no additional functional genes under  
427 putative natural selection have been identified (Rosser et al., 2017). A recent study also  
428 highlights the importance of variation in gene expression in maintaining ecological divergence  
429 (i.e. polygenic adaptation) across a sympatrically distributed coral species complex (Rose et al.,  
430 2018).

431 While our dataset is limited because only loci from *B. annulata* that map to the *E. pallida*  
432 genome are able to be identified, and we did not conduct a comparative transcriptomic  
433 investigation, our results may at least provide a basic starting point for future genomic  
434 investigations into tropical anthozoan speciation. All loci detected by BayeScan as being under  
435 divergent selection were mapped to the annotated *E. pallida* genome to identify loci that may be  
436 linked to functional genes. Five of the six loci were mapped to mRNA transcripts and CDS/exon  
437 regions (Table 6). Locus 1 mapped to a mRNA transcript linked to a predicted neuronal  
438 acetylcholine receptor subunit alpha gene, a cell membrane receptor involved in muscle

439 activation when acetylcholine is released by motor nerves in the central nervous system. Locus  
440 97 mapped to a 3' untranslated region (UTR) in an mRNA transcript linked to a predicted C-C  
441 chemokine receptor type 4. The C-C chemokine receptors are well characterized cell signaling  
442 pathways involved in immune responses (e.g. Murphy, 1994). The type 4 receptor transports  
443 leukocytes in vertebrates. Genes involved in vertebrate immune cell communication have been  
444 shown to evolve rapidly, thought to be a response to intense selective pressures placed on them  
445 by the molecular mimicry of microbes disrupting host immune responses (Bajoghil, 2013;  
446 Zlotnik, Yoshie, & Nomiya, 2006). Other loci under selection that mapped to transcriptomic  
447 regions of the *E. pallida* genome include membrane proteins involved in lipid binding and  
448 recognition, vesicular trafficking, signal transduction, and phagocytosis (locus 197; den Hertog,  
449 1999), a candidate toxin protein that is a well characterized component of snake venom (locus  
450 1160; Doley & Kini, 2009), and proteins that bind to myosin and are involved in muscle  
451 contraction (Locus 1326). While it's unclear whether, how, or why any of these identified  
452 functional genes maintain linkage disequilibrium, and thus putative species boundaries,  
453 ecological specialization could certainly drive adaptive divergence in immune response if  
454 different niches are exposed to different pathogens. It is also not hard to imagine that a shift in  
455 exposure to different prey types across disparate habitats could lead to a corresponding shift in  
456 venom composition or toxicity. The finding that 5/6 loci under divergent selection mapped to  
457 mRNA transcripts, and 2 of these loci mapped within CDS/exon regions is consistent with the  
458 idea that selection may play an important role in maintaining species boundaries between these  
459 cryptic taxa.

460

461 *4.2. Tropical sea anemone diversity*

462 *Bartholomea annulata* is the first tropical anemone species complex to be delimited using  
463 genomic data and a molecular systematic approach. With simple body plans, hydrostatic  
464 skeletons, no rigid structures, and few diagnostic characters (most of which are highly  
465 convergent; e.g. Rodriguez et al., 2014), morphological studies of sea anemones are challenging  
466 (Fautin, 1988), and much of the species-level diversity that exists could be cryptic. The lack of  
467 informative morphological characters is compounded by the history of molecular biology and the  
468 slow rate of mitochondrial genome evolution in anthozoans (Daly, Gusmão, Reft, & Rodríguez,  
469 2010; Shearer, Van Oppen, Romano, & Wörheide, 2002). Short regions of mitochondrial DNA  
470 barcodes (mtDNA) became the molecular marker of choice for evolutionary biologists  
471 conducting population-level studies in most animal phyla (e.g. Avise, 2009). An unintended  
472 byproduct of these early studies was that biologists began uncovering highly divergent lineages  
473 in taxa that were nominally described as single morphological species. While anemone mtDNA  
474 is used in phylogenetics to resolve deeper taxonomic relatedness, it is incapable of picking up  
475 shallow divergence times, which are characteristic of many cryptic species complexes (Daly et  
476 al., 2010). Similarly, the universal molecular markers from the nuclear genome that are used for  
477 phylogenetic reconstruction are also too slowly evolving for population level studies (Daly et al.,  
478 2010). Finally, sea anemone diversity peaks in temperate regions where they are often the  
479 dominant benthic macrofauna, but lack species diversity in the tropics, which are dominated by  
480 scleractinian corals and octocorals (Fautin, Malarky & Soberon, 2002). This convergence of  
481 factors has led to a lack of evolutionary attention to tropical anemone species compared to  
482 temperate ones, and diversity in the tropics is likely under described as a result. Our findings  
483 demonstrate the utility of genomic data for discovering and delimiting cryptic anemone species  
484 that are likely to be missed using conventional markers. An important note, however, is that we

485 used BFD\* for our genomic species delimitation analyses. BFD\* implements the multi-species  
486 coalescent model, which has been shown to be unable to distinguish between intraspecific  
487 population genetic structure and species boundaries under some speciation models (Sukumaran  
488 & Knowles, 2017). With this in mind, we suggest a targeted morphological study of both  
489 delimited lineages, and possibly an RNAseq approach to search for fixed SNPs and variation in  
490 expression levels in functional genes we have preliminarily identified here. Additional types of  
491 data could independent lines of evidence in support of our analyses here.

492

### 493 **Acknowledgements**

494 We are grateful to Erich Bartels, Annelise del Rio, Jose Diaz, Dan Exton, Lisle Gibbs, Natalie  
495 Hamilton, Alex Hunter, Anna Klompen Jason Macrander, Spencer Palombit, Stephen Ratchford,  
496 Nuno Simoes, Jill Titus, Cory Walter, Eric Witt, Clay Vondriska, and the Operation Wallacea  
497 dive staff for assistance in the field and laboratory. We also thank Jordan Satler, Megan Smith,  
498 and Bryan Carstens for discussion and advice regarding *fastscoal2* analyses and model  
499 selection. Bellairs Research Station, the Bermuda Institute of Ocean Science, Cape Eleuthera  
500 Institute, CARMABI, Coral View Dive Center, Gerace Research Centre, the Honduran Coral  
501 Reef Foundation, Mote Marine Laboratory, Smithsonian Tropical Research Institute, and the  
502 University of the Virgin Islands provided valuable logistical support in the field. Specimens were  
503 collected from throughout the Tropical Western Atlantic under permits: SE/A-88- 15,  
504 PPF/DGOPA-127/14, CZ01/9/9, FKNMS-2012-155, SAL-12-1432A-SR, STT037-14, 140408,  
505 MAR/FIS/17, and 19985. This research was supported by funding from a National Science  
506 Foundation-Doctoral Dissertation Improvement Grant DEB-1601645 and Florida Fish and  
507 Wildlife Conservation Commission awards to B.M.T. & M.D. Operation Wallacea, American



508 Philosophical Society, International Society for Reef Studies Graduate Fellowship, PADI  
509 Foundation Grant, and American Museum of Natural History Lerner Gray Funds funded field  
510 research for B.M.T. Additional funding was provided through the Trautman Fund of The OSU  
511 Museum of Biological Diversity, The Ohio State University, and National Science Foundation  
512 DEB-1257796 to MD.

513

## 514 **References**

- 515 Andras, J. P., Kirk, N. L., & Harvell, C. D. (2011). Range-wide population genetic structure of  
516 *Symbiodinium* associated with the Caribbean Sea fan coral, *Gorgonia ventalina*.  
517 *Molecular Ecology*, 20, 2525–2542.
- 518 Andras, J. P., Rypien, K. L., & Harvell, C. D. (2013). Range-wide population genetic structure of  
519 the Caribbean sea fan coral, *Gorgonia ventalina*. *Molecular Ecology*, 22, 56-73.
- 520 Arnold, B., Corbett-Detig, R. B., Hartl, D., & Bomblies, K. (2013). RADseq underestimates  
521 diversity and introduces genealogical biases due to nonrandom haplotype  
522 sampling. *Molecular Ecology*, 22, 3179-3190.
- 523 Avise, J. C. (2009). Phylogeography: retrospect and prospect. *Journal of Biogeography*, 36, 3-  
524 15.
- 525 Bajoghli, B. (2013). Evolution and function of chemokine receptors in the immune system of  
526 lower vertebrates *European Journal of Immunology*, 43, 1686-1692.
- 527 Bernal, M. A., Gaither, M. R., Simison, W. B., & Rocha, L. A. (2017). Introgression and  
528 selection shaped the evolutionary history of sympatric sister-species of coral reef fishes  
529 (genus: *Haemulon*). *Molecular Ecology*, 26, 639-652.
- 530 Bird, C. E., Fernandez-Silva, I., Skillings, D. J., & Toonen, R. J. (2012). Sympatric speciation in  
531 the post “modern synthesis” era of evolutionary biology. *Evolutionary Biology*, 39, 158-  
532 180.
- 533 Bolnick, D. I., Fitzpatrick, & B. M. (2007). Sympatric speciation: models and empirical  
534 evidence. *Annual Review of Ecology, Evolution, and Systematics*, 38, 459-487.
- 535 Baumgarten, S., Simakov, O., Esherick, L. Y., Liew, Y. J., Lehnert, E. M., Michell, C. T., Li, Y.,  
536 Hambleton, E. A., Guse, A., Oates, M. E., & Gough, J. (2015). The genome of *Aiptasia*, a  
537 sea anemone model for coral symbiosis. *Proceedings of the National Academy of*  
538 *Sciences*, 112, 11893-11898.
- 539 Bongaerts, P., Riginos, C., Ridgway, T., Sampayo, E. M., van Oppen, M. J., Englebert, N.,  
540 Vermeulen, F., & Hoegh-Guldberg, O. (2010). Genetic divergence across habitats in the  
541 widespread coral *Seriatopora hystrix* and its associated *Symbiodinium*. *PLOS ONE*, 5,  
542 e10871.
- 543 Bongaerts, P., Frade, P. R., Ogier, J. J., Hay, K. B., Van Bleijswijk, J., Englebert, N., Vermeij,  
544 M. J., Bak, R. P., Visser, P. M., & Hoegh-Guldberg, O. (2013). Sharing the slope: depth  
545 partitioning of agariciid corals and associated *Symbiodinium* across shallow and  
546 mesophotic habitats (2-60 m) on a Caribbean reef. *BMC Evolutionary Biology*, 13, 205.

- 547 Bouckaert, R., Heled, J., Kühnert, D., Vaughan, T., Wu, C.H., Xie, D., Suchard, M.A., Rambaut,  
548 A., & Drummond, A.J. (2014). BEAST 2: a software platform for Bayesian evolutionary  
549 analysis. *PLOS Computational Biology*, *10*, p.e1003537.
- 550 Bowen, B. W., Rocha, L. A., Toonen, R. J., Karl, S. A., & ToBo Lab (2013). The origins of  
551 tropical marine biodiversity. *Trends in Ecology and Evolution* *28*, 359-366.
- 552 Briones-Fourzán, P., Pérez-Ortiz, M., Negrete-Soto, F., Barradas-Ortiz, C., & Lozano-Álvarez,  
553 E. (2012). Ecological traits of Caribbean sea anemones and symbiotic  
554 crustaceans. *Marine Ecology Progress Series*, *470*, 55-68.
- 555 Bryant, D., Bouckaert, R., Felsenstein, J., Rosenberg, N. A., & RoyChoudhury, A. (2012).  
556 Inferring species trees directly from biallelic genetic markers: bypassing gene trees in a  
557 full coalescent analysis. *Molecular Biology and Evolution*, *29*, 1917-1932.
- 558 Camacho, C., Coulouris, G., Avagyan, V., Ma, N., Papadopoulos, J., Bealer, K., & Madden, T.  
559 L. (2009). BLAST+: architecture and applications. *BMC Bioinformatics*, *10*, 421.
- 560 Carstens, B. C., Pelletier, T. A., Reid, N. M., & Satler, J. D. (2013). How to fail at species  
561 delimitation. *Molecular Ecology*, *22*, 4369-4383.
- 562 Christe, C., Stölting, K. N., Paris, M., Fraïsse, C., Bierne, N., & Lexer, C. (2017). Adaptive  
563 evolution and segregating load contribute to the genomic landscape of divergence in two  
564 tree species connected by episodic gene flow. *Molecular Ecology*, *26*, 59-76.
- 565 Coyne, J. A., & Orr, H. A. (2004). Speciation. Sunderland, MA.
- 566 Daly, M., Gusmão, L. C., Reft, A. J., & Rodríguez, E. (2010). Phylogenetic signal in  
567 mitochondrial and nuclear markers in sea anemones (Cnidaria, Actiniaria). *Integrative  
568 and Comparative Biology*, *50*, 371-388.
- 569 DeBiasse, M. B., Richards, V. P., Shivji, M. S., & Hellberg, M. E. (2016). Shared  
570 phylogeographical breaks in a Caribbean coral reef sponge and its invertebrate  
571 commensals. *Journal of Biogeography*, *43*, 2136-2146.
- 572 den Hertog, J. (1999). Protein-tyrosine phosphatases in development. *Mechanisms of  
573 Development*, *85*, 3-14.
- 574 Dennenmoser, S., Vamosi, S. M., Nolte, A. W., & Rogers, S. M. (2017). Adaptive genomic  
575 divergence under high gene flow between freshwater and brackish-water ecotypes of  
576 prickly sculpin (*Cottus asper*) revealed by Pool-Seq. *Molecular Ecology*, *26*, 25-42.
- 577 Doley, R., & Kini, R. M. (2009). Protein complexes in snake venom. *Cellular and Molecular  
578 Life Sciences*, *66*, 2851-2871.
- 579 Eaton, D. A. (2014). PyRAD: assembly of de novo RADseq loci for phylogenetic  
580 analyses. *Bioinformatics*, *30*, 1844-1849.
- 581 Edgar, R. C. (2004). MUSCLE: multiple sequence alignment with high accuracy and high  
582 throughput. *Nucleic Acids Research* *32*, 1792-1797.
- 583 Evanno, G., Regnaut, S., & Goudet, J. (2005). Detecting the number of clusters of individuals  
584 using the software STRUCTURE: a simulation study. *Molecular Ecology*, *14*, 2611-  
585 2620.
- 586 Excoffier, L., Dupanloup, I., Huerta-Sánchez, E., Sousa, V. C., & Foll, M. (2013). Robust  
587 demographic inference from genomic and SNP data. *PLOS Genetics*, *9*, e1003905.
- 588 Fautin, D. G., Malarky, L., & Soberon, J. (2013). Latitudinal diversity of sea anemones  
589 (Cnidaria: Actiniaria). *The Biological Bulletin*, *224*, 89-98.
- 590 Feder, J. L., Egan, S. P., & Nosil, P. (2012). The genomics of speciation-with-gene-flow. *Trends  
591 in Genetics*, *28*, 342-350.

- 592 Foll, M., & Gaggiotti, O. (2008). A genome-scan method to identify selected loci appropriate for  
593 both dominant and codominant markers: a Bayesian perspective. *Genetics*, *180*, 977-993.
- 594 Gaither, M. R., & Rocha, L. A. (2013). Origins of species richness in the Indo-Malay-Philippine  
595 biodiversity hotspot: evidence for the centre of overlap hypothesis. *Journal of*  
596 *Biogeography*, *40*, 1638-1648.
- 597 Gaither, M. R., Bernal, M. A., Coleman, R. R., Bowen, B. W., Jones, S. A., Simison, W. B.,  
598 Rocha, L. A. (2015). Genomic signatures of geographic isolation and natural selection in  
599 coral reef fishes. *Molecular Ecology*, *24*, 1543-1557.
- 600 Getz, W. M., & Kaitala, V. (1989). Ecogenetic models, competition, and heteropatry. *Theoretical*  
601 *Population Biology*, *36*, 34-58.
- 602 Grajales, A., & Rodríguez, E. (2016). Elucidating the evolutionary relationships of the  
603 Aiptasiidae, a widespread cnidarian–dinoflagellate model system. (Cnidaria: Anthozoa:  
604 Actiniaria: Metridioidea). *Molecular Phylogenetics and Evolution*, *94*, 252-263.
- 605 Hodge, J. R., Read, C. I., Bellwood, D. R., & Herwerden, L. (2013). Evolution of sympatric  
606 species: a case study of the coral reef fish genus *Pomacanthus* (Pomacanthidae). *Journal*  
607 *of Biogeography*, *40*, 1676-1687
- 608 Huang, H., & Knowles, L. L. (2014). Unforeseen consequences of excluding missing data from  
609 next-generation sequences: simulation study of RAD sequences. *Systematic Biology*, *65*,  
610 357-365.
- 611 Jennison, B. L. (1981). Reproduction in three species of sea anemones from Key West,  
612 Florida. *Canadian Journal of Zoology*, *59*, 1708-1719.
- 613 Kearse, M., Moir, R., Wilson, A., Stones-Havas, S., Cheung, M., Sturrock, S., Buxton, S.,  
614 Cooper, A., Markowitz, S., Duran, C., & Thierer, T. (2012). Geneious Basic: an  
615 integrated and extendable desktop software platform for the organization and analysis of  
616 sequence data *Bioinformatics*, *28*, 1647-1649.
- 617 Knowles, L. L. (2009). Statistical phylogeography. *Annual Review of Ecology, Evolution, and*  
618 *Systematics* *40*, 593-612.
- 619 Leaché, A. D., Fujita, M. K., Minin, V. N., & Bouckaert, R. R. (2014). Species delimitation  
620 using genome-wide SNP data. *Systematic Biology*, *63*, 534-542.
- 621 Munday, P. L., van Herwerden, L., & Dudgeon, C. L. (2004). Evidence for sympatric speciation  
622 by host shift in the sea. *Current Biology*, *14*, 1498-1504.
- 623 Murphy, P. M. (1994). The molecular biology of leukocyte chemoattractant receptors *Annual*  
624 *Review of Immunology*, *12*, 593-633.
- 625 Nadeau, N. J., Whibley, A., Jones, R. T., Davey, J. W., Dasmahapatra, K. K., Baxter, S. W.,  
626 Quail, M. A., Joron, M., Blaxter, M. L., Mallet, J. & Jiggins, C. D. (2012). Genomic  
627 islands of divergence in hybridizing *Heliconius* butterflies identified by large-scale  
628 targeted sequencing. *Philosophical Transactions of the Royal Society of London B:*  
629 *Biological Sciences*, *367*, 343-353.
- 630 Orr, M. R., Smith, T. B. (1998). Ecology and speciation. *Trends in Ecology and Evolution*, *13*,  
631 502-506.
- 632 Prada, C., Hanna, B., Budd, A. F., Woodley, C. M., Schmutz, J., Grimwood, J., Iglesias-Prieto,  
633 R., Pandolfi, J. M., Levitan, D., Johnson, K. G., & Knowlton, N. (2016). Empty Niches  
634 after Extinctions Increase Population Sizes of Modern Corals. *Current Biology*, *26*, 3190-  
635 3194.
- 636 Pritchard, J. K., Stephens, M., & Donnelly, P. (2000). Inference of population structure using  
637 multilocus genotype data. *Genetics*, *155*, 945-959.

- 638 Quenouille, B., Hubert, N., Bermingham, E., & Planes, S. (2011). Speciation in tropical seas:  
639 allopatry followed by range change. *Molecular Phylogenetics and Evolution*, *58*, 546-  
640 552.
- 641 R Core Team (2014). R: a language and environment for statistical computing R Foundation for  
642 Statistical Computing, Vienna, Austria.
- 643 Renaut, S., Grassa, C. J., Yeaman, S., Moyers, B. T., Lai, Z., Kane, N. C., Bowers, J. E., Burke,  
644 J. M. & Rieseberg, L. H. (2013). Genomic islands of divergence are not affected by  
645 geography of speciation in sunflowers. *Nature Communications*, *4*, p1827.
- 646 Renema, W., Bellwood, D. R., Braga, J. C., Bromfield, K., Hall, R., Johnson, K. G., Lunt, P.,  
647 Meyer, C. P., McMonagle, L. B., Morley, R. J. & O'dea, A. (2008). Hopping hotspots:  
648 global shifts in marine biodiversity. *Science*, *321*, 654-657.
- 649 Richardson, P.L. (2005). Caribbean Current and eddies as observed by surface drifters. *Deep Sea*  
650 *Research Part II: Topical Studies in Oceanography*, *52*, 429–463.
- 651 Rocha, L. A., & Bowen, B. W. (2008). Speciation in coral-reef fishes. *Journal of Fish*  
652 *Biology*, *72*, 1101-1121.
- 653 Rodríguez, E., Barbeitos, M. S., Brugler, M. R., Crowley, L. M., Grajales, A., Gusmão, L.,  
654 Haussermann, V., Reft, A., & Daly, M. (2014). Hidden among sea anemones: the first  
655 comprehensive phylogenetic reconstruction of the order Actiniaria (Cnidaria, Anthozoa,  
656 Hexacorallia) reveals a novel group of hexacorals. *PLOS ONE*, *9*, e96998.
- 657 Rose, N. H., Bay, R. A., Morikawa, M. K., & Palumbi, S. R. (2018). Polygenic evolution drives  
658 species divergence and climate adaptation in corals. *Evolution*, *72*, 82-94.
- 659 Rosser, N. L., Thomas, L., Stankowski, S., Richards, Z. T., Kennington, W. J. & Johnson, M. S.  
660 (2017). Phylogenomics provides new insight into evolutionary relationships and  
661 genealogical discordance in the reef-building coral genus *Acropora*. *Proceedings of the*  
662 *Royal Society B-Biological Sciences*, *284*, 20162182.
- 663 Satler, J. D., & Carstens, B.C. (2017). Do ecological communities disperse across biogeographic  
664 barriers as a unit? *Molecular Ecology*, *26*, 3533-3545.
- 665 Shearer, T. L., Van Oppen, M. J. H., Romano, S. L., & Wörheide, G. (2002). Slow mitochondrial  
666 DNA sequence evolution in the Anthozoa (Cnidaria). *Molecular Ecology*, *11*, 2475-2487.
- 667 Smith, M. L., Ruffley, M., Espíndola, A., Tank, D. C., Sullivan, J., & Carstens, B. C. (2017).  
668 Demographic model selection using random forests and the site frequency  
669 spectrum. *Molecular Ecology*, *26*, 4562-4573.
- 670 Sovic, M. G., Fries, A. C., & Gibbs, H. L. (2016). Origin of a cryptic lineage in a threatened  
671 reptile through isolation and historical hybridization. *Heredity*, *117*, 358-366.
- 672 Sukumaran, J., & Knowles, L. L. (2017). Multispecies coalescent delimits structure, not  
673 species. *Proceedings of the National Academy of Sciences*, *114*, 1607-1612.
- 674 Titus, B. M., Daly, M. (2017). Specialist and generalist symbionts show counterintuitive levels  
675 of genetic diversity and discordant demographic histories along the Florida Reef Tract.  
676 *Coral Reefs*, *36*, 339-354.
- 677 Titus B. M., Daly, M., Exton, D. A. (2015). Temporal patterns of Pederson shrimp (*Ancylomenes*  
678 *pedersoni* Chace 1958) cleaning interactions of Caribbean coral reefs. *Marine Biology*,  
679 *162*, 1651-1664.
- 680 Titus B. M., Daly, M., Macrander, J., Del Rio, A., Santos, S. R., & Chadwick, N. E. (2017)  
681 Contrasting abundance and contribution of clonal proliferation to the population structure  
682 of the corkscrew sea anemone *Bartholomea annulata* in the tropical Western Atlantic.  
683 *Invertebrate Biology*, *136*, 62-74.

- 684 Tobler, M., Riesch, R., Tobler, C. M., Schulz-Mirbach, T., Plath, M. (2009). Natural and sexual  
685 selection against immigrants maintains differentiation among micro-allopatric  
686 populations. *Journal of Evolutionary Biology*, 22, 2298-2304.  
687 Via, S. (2001). Sympatric speciation in animals: the ugly duckling grows up. *Trends in Ecology  
688 and Evolution*, 16, 381-390.  
689 Via, S. (2012). Divergence hitchhiking and the spread of genomic isolation during ecological  
690 speciation-with-gene-flow. *Philosophical Transactions of the Royal Society of London B:  
691 Biological Sciences*, 367, 451-460.  
692 Zlotnik, A., Yoshie, O., Nomiya, H. (2006). The chemokine and chemokine receptor  
693 superfamilies and their molecular evolution. *Genome Biology*, 7, 243.  
694

695

696 **Data Accessibility Statement:** Raw sequence data and all files for all analyses will be archived  
697 in Dryad upon final acceptance of this manuscript. Python scripts are also available on  
698 GitHub ([github.com/pblischak/Bann\\_spdelim](https://github.com/pblischak/Bann_spdelim)).

699

700 **Author Contributions:** B.M.T. and M.D. conceived the study research; B.M.T. collected  
701 samples and conducted laboratory work. B.M.T., P.D.B. analyzed the data and conducted  
702 bioinformatics work. B.M.T., P.D.B., and M.D. wrote and edited the manuscript.

703

704

705

706

707

708

709

710

711

712 **Tables**

713

714 Table 1. Sample localities, sample sizes, and geographic coordinates of corkscrew sea anemone

715 *Bartholomea annulata* used in this study. Sample sizes reflect the number samples sequenced

716 and the number of samples retained in the final double digest Restriction-site Associated DNA

717 sequencing (ddRADseq) dataset (in parentheses). Differences between the number of samples

718 sequenced and retained reflects variation in the number of sequence reads and sequencing

719 coverage in out ddRADseq dataset across all individuals.

| Locality                      | Code | Sample size | Latitude      | Longitude     |
|-------------------------------|------|-------------|---------------|---------------|
| Eleuthera, Bahamas            | BH   | 10 (9)      | 24°49'44.51"N | 76°16'46.11"W |
| San Salvador, Bahamas         | SAN  | 10 (2)      | 24° 2'37.12"N | 74°31'59.83"W |
| Barbados                      | BR   | 10 (9)      | 13°11'30.52"N | 59°38'29.04"W |
| Bermuda                       | BD   | 12 (9)      | 32°26'53.62"N | 64°45'45.42"W |
| Curacao                       | CU   | 10 (2)      | 12° 7'19.45"N | 68°58'10.80"W |
| Ft. Lauderdale, Florida, USA  | FT   | 9 (9)       | 26° 4'19.80"N | 80° 5'46.68"W |
| Upper Keys, Florida, USA      | UK   | 10 (9)      | 25° 1'57.92"N | 80°22'4.45"W  |
| Middle Keys, Florida, USA     | MK   | 10 (10)     | 24°41'58.09"N | 80°56'21.48"W |
| Lower Keys, Florida, USA      | LK   | 10 (10)     | 24°33'42.39"N | 81°23'31.59"W |
| Utila, Honduras               | UT   | 10 (10)     | 16° 5'18.03"N | 86°54'38.54"W |
| Cayos Cochinos, Honduras      | CC   | 10 (9)      | 15°57'1.12"N  | 86°29'51.82"W |
| Mahahual, Mexico              | MX   | 10 (10)     | 18°42'18.45"N | 87°42'34.46"W |
| Bocas del Toro, Panama        | PA   | 10 (10)     | 9°25'7.28"N   | 82°20'32.55"W |
| St. Thomas, US Virgin Islands | VI   | 11 (11)     | 18°19'0.69"N  | 64°59'22.59"W |

720

721

722

723

724

725

726

727 Table 2. Results of Structure analyses for the corkscrew anemone *Bartholomea annulata*.  $K$  is  
728 the number of genetic clusters tested for each model. Highlighting indicates the model with the  
729 best support, as determined by the mean natural log posterior probabilities [ $\ln P(K)$ ] and delta  $K$   
730 ( $\Delta K$ ).

| $K$ | Iterations | mean $\ln P(K)$ | Stdev $\ln P(K)$ | $\Delta K$ |
|-----|------------|-----------------|------------------|------------|
| 1   | 5          | -535786.16      | 18.47            | N/A        |
| 2   | 5          | -194732.23      | 27.09            | 12637.83   |
| 3   | 5          | -196054.70      | 249.66           | 4.42       |
| 4   | 5          | -196272.33      | 738.44           | 0.99       |
| 5   | 5          | -197221.50      | 2098.35          | 36.97      |
| 6   | 5          | -275748.30      | 135217.75        | N/A        |

731

732

733

734

735

736

737

738

739

740

741

742 Table 3. Path sampling results for two species delimitation models for *Bartholomea annulata* in  
743 the Tropical Western Atlantic. All Bayes Factor calculations are made against the current model  
744 describing *B. annulata* as a single species. Positive Bayes Factors indicate support for the current  
745 model. Negative Bayes Factors indicate support for the alternative model, in which *B. annulata*  
746 comprises two species. For both models, *Exaiptasia pallida* was included as an outgroup. The  
747 higher ranked model is highlighted.

| <b>Model</b>                                                                | <b>Species</b> | <b>MLE</b> | <b>Rank</b> | <b>BF</b> |
|-----------------------------------------------------------------------------|----------------|------------|-------------|-----------|
| <i>E. pallida</i> + current concept                                         | 2              | -3194.20   | 2           | -         |
| <i>E. pallida</i> + <i>B. annulata</i> Clade 1 + <i>B. annulata</i> Clade 2 | 3              | -3087.25   | 1           | -213.90   |

748 MLE = Marginal Likelihood Estimate; BF = Bayes Factor

749  
750  
751  
752  
753  
754  
755  
756  
757  
758  
759  
760



761 Table 4. Akaike Information Criterion (AIC) results for model selection results from FSC2.  
 762 Model refers to those depicted and described in Figure 2.  $k$  = number of parameters in the model,  
 763  $\Delta_i$  = change in AIC scores, and  $w_i$  = Akaike weights. Models are listed according to their AIC  
 764 rank and the highest-ranked model is highlighted.

| <b>Model</b>                  | <b><math>k</math></b> | <b>ln(Likelihood)</b> | <b>AIC</b> | <b><math>\Delta_i</math></b> | <b>Model Likelihoods</b> | <b><math>w_i</math></b> |
|-------------------------------|-----------------------|-----------------------|------------|------------------------------|--------------------------|-------------------------|
| 5 – IM <sub>12</sub>          | 5                     | -2285.63              | 4581.27    | 0                            | 1                        | 0.65                    |
| 10 – IM <sub>ISO-MIG-12</sub> | 6                     | -2285.52              | 4583.04    | 1.76                         | 0.41                     | 0.27                    |
| 9 – IM <sub>MIG-12-ISO</sub>  | 6                     | -2287.03              | 4586.07    | 4.79                         | 0.09                     | 0.06                    |
| 7 – IM <sub>MIG-ISO</sub>     | 7                     | -2287.24              | 4588.49    | 7.21                         | 0.02                     | 0.02                    |
| 8 – IM <sub>ISO-MIG</sub>     | 7                     | -2293.17              | 4600.35    | 19.07                        | 7.20e <sup>-5</sup>      | 4.70e <sup>-5</sup>     |
| 3 – IM                        | 6                     | -2294.36              | 4600.72    | 19.44                        | 5.97e <sup>-5</sup>      | 3.90e <sup>-5</sup>     |
| 1 – ISO                       | 4                     | -2309.26              | 4626.52    | 45.25                        | 1.49e <sup>-10</sup>     | 9.73e <sup>-11</sup>    |
| 6 – IM <sub>21</sub>          | 5                     | -2322.01              | 4654.03    | 72.75                        | 1.58e <sup>-16</sup>     | 1.03e <sup>-16</sup>    |
| 11 – IM <sub>MIG-21-ISO</sub> | 6                     | -2357.18              | 4726.37    | 145.09                       | 3.11e <sup>-32</sup>     | 2.03e <sup>-32</sup>    |
| 12 – IM <sub>ISO-MIG-12</sub> | 6                     | -2362.40              | 4736.80    | 155.52                       | 1.69e <sup>-34</sup>     | 1.10e <sup>-34</sup>    |
| 2 – ISC <sub>C</sub>          | 11                    | -2436.15              | 4894.31    | 313.03                       | 1.06e <sup>-68</sup>     | 6.92e <sup>-69</sup>    |
| 4 – IM <sub>C</sub>           | 12                    | -2557.29              | 5138.59    | 557.31                       | 9.55e <sup>-122</sup>    | 6.23e <sup>-122</sup>   |

765

766

767

768

769 Table 5. Population genetic parameter estimates from FSC2 for the two cryptic lineages of  
 770 *Bartholomea annulata* (Clade 1 & Clade 2) for the two demographic models with the highest  
 771 Akaike model weights from Table 4. Parameter estimates generated with unlinked allele  
 772 frequency spectrum data. Divergence time ( $\tau$ ) and time at secondary contact ( $\tau-M$ ) are in  
 773 millions of years (mya), effective population sizes ( $N_e$ ) are presented as the effective number of  
 774 individuals in each population, and migration rates ( $M$ ) are presented as the effective number of  
 775 migrants per generation. N/A refers to parameters that were not included in the model.

| <b>Model</b> | <b><math>\tau</math> (mya)</b> |               | <b><math>N_e</math> Clade1</b> |               | <b><math>N_e</math> Clade2</b> |                 | <b><math>\tau-M</math></b> |               | <b><math>M_{12}</math></b> |                         |
|--------------|--------------------------------|---------------|--------------------------------|---------------|--------------------------------|-----------------|----------------------------|---------------|----------------------------|-------------------------|
|              | Mean                           | 95% CI        | Mean                           | 95% CI        | Mean                           | 95% CI          | Mean                       | 95% CI        | Mean                       | 95% CI                  |
| <b>5</b>     | 2.11                           | ( $\pm$ 1.62) | 23.70                          | ( $\pm$ 10.4) | 107,348                        | ( $\pm$ 5339)   | N/A                        | N/A           | $4.7e^{-5}$                | ( $\pm$ $6.04 e^{-6}$ ) |
| <b>10</b>    | 8.87                           | ( $\pm$ 3.20) | 45.40                          | ( $\pm$ 5302) | 98,213                         | ( $\pm$ 10,619) | 2.10                       | ( $\pm$ 2.05) | $5.5e^{-5}$                | ( $\pm$ $1.63 e^{-5}$ ) |

776

777

778

779

780

781

782

783

784

785

786

787

788 Table 6. List of *Bartholomea annulata* outlier loci detected by BayeScan, the genome scaffold  
 789 number they map to in the *Exaiptasia pallida* genome, whether they fall within an annotated  
 790 region of the genome, and their closest functional gene identity. Loci identified as being within  
 791 coding regions (CDS) and exons map within the specific gene listed. Loci identified as mRNA  
 792 transcripts are listed beside the functional gene that corresponds with that transcript. Loci listed  
 793 as N/A do not map to any known functional regions. Instead, the closest functional gene in the *E.*  
 794 *pallida* genome is listed to the right. Highlighted loci (1, 97, 197, 1160, 1224, and 1326) are  
 795 those under divergent selection (high Fst).

| Locus | Genome scaffold # | Annotation  | Closest functional gene                                                             |
|-------|-------------------|-------------|-------------------------------------------------------------------------------------|
| 1     | 54                | mRNA        | <i>E. pallida</i> : neuronal acetylcholine receptor subunit alpha-10-like-PREDICTED |
| 10    | 83                | mRNA/3' UTR | <i>E. pallida</i> : peroxisomal coenzyme A diphosphatase NUDT7-like-PREDICTED       |
| 19    | 237               | N/A         | <i>E. pallida</i> : inactive rhomboid protein 1-like-PREDICTED                      |
| 27    | 28                | mRNA/5' UTR | <i>E. pallida</i> : ubiquitin carboxyl-terminal hydrolase 8-like-PREDICTED          |
| 97    | 14                | mRNA/3' UTR | <i>E. pallida</i> : C-C chemokine receptor type 4-like-PREDICTED                    |
| 142   | 86                | CDS/exon    | <i>E. pallida</i> : twisted gastrulation protein homolog-PREDICTED                  |
| 197   | 197               | CDS/exon    | <i>E. pallida</i> : zinc finger FYVE domain-containing protein 1-like-PREDICTED     |
| 265   | 100               | CDS/exon    | <i>E. pallida</i> : dual serine/threonine & tyrosine protein kinase-like-PREDICTED  |
| 310   | 407               | CDS/exon    | <i>E. pallida</i> : melatonin receptor type 1A-like-PREDICTED                       |
| 321   | 25                | CDS/exon    | <i>E. pallida</i> : protocadherin-like protein-PREDICTED                            |
| 399   | 66                | CDS/exon    | <i>E. pallida</i> : posphatidylineositide phosphate SAC2-like-PREDICTED             |
| 522   | 233               | CDS/exon    | <i>E. pallida</i> : uncharacterized protein                                         |
| 602   | 358               | N/A         | <i>E. pallida</i> : fibropellin-1-like transcript variant X1-PREDICTED              |
| 684   | 138               | CDS/exon    | <i>E. pallida</i> : YTH domain containing family protein 1-like-PREDICTED           |
| 725   | 64                | mRNA/5'UTR  | <i>E. pallida</i> : uncharacterized protein                                         |
| 744   | 62                | CDS/exon    | <i>E. pallida</i> : NAD-dependent progein deacetylase SRT1-like-PREDICTED           |
| 757   | 78                | mRNA        | <i>E. pallida</i> : dnaJ homolog subfamily C member 11-like-PREDICTED               |
| 766   | 197               | N/A         | <i>E. pallida</i> : zinc metalloproteinase nas-13-like-PREDICTED                    |
| 776   | 2486              | N/A         | <i>E. pallida</i> : formin binding protein 4-like-PREDICTED                         |

|      |      |          |                                                                                          |
|------|------|----------|------------------------------------------------------------------------------------------|
| 814  | 542  | N/A      | <i>E. pallida</i> : zinc finger protein 567-like-PREDICTED                               |
| 851  | 764  | mRNA     | <i>E. pallida</i> : uncharacterized protein                                              |
| 1013 | 99   | CDS/exon | <i>E. pallida</i> : pre-mRNA-processing-splicing factor 8-PREDICTED                      |
| 1017 | 1177 | mRNA     | <i>E. pallida</i> : Golgi-associated plant pathogenesis-related protein 1-like-PREDICTED |
| 1043 | 155  | CDS/exon | <i>E. pallida</i> : GDAP2 protein homolog-PREDICTED                                      |
| 1131 | 109  | N/A      | <i>E. pallida</i> : uncharacterized                                                      |
| 1159 | 211  | CDS/exon | <i>E. pallida</i> : germinal center kinase 3-like-PREDICTED                              |
| 1160 | 210  | CDS/exon | <i>E. pallida</i> : snaclec rhodocetin subunit alpha-like-PREDICTED                      |
| 1213 | 5    | CDS/exon | <i>E. pallida</i> : uncharacterized protein                                              |
| 1224 | 210  | N/A      | <i>E. pallida</i> : receptor-type tyrosine-protein phosphatase delta-like-PREDICTED      |
| 1312 | 19   | CDS/exon | <i>E. pallida</i> : nesprin-1-like-PREDICTED                                             |
| 1326 | 30   | mRNA     | <i>E. pallida</i> : phosphatase 1 regulatory subunit 12A-like-PREDICTED                  |

796
